# Supplementary material for: Factors That Constitute Challenges to Community Policing and Security in Anambra State of Nigeria
Source: Research Square preprint supplement (doi:10.21203/rs.3.rs-5034240/v1), 2024-09-06
Supplement: Supplementary file 1 [file a42d4f101a7a842a1b9ad391.doc]

**Table 1: Percentage distribution of respondents by sex.**

*Question: Gender?*

**Sex Status Frequency Percent (%)**

Male 125 55.6

Female 100 44.4

**Total 225 100.0**

Source: Field Work, 2017

**Table 2: Percentage distribution of respondents by age.**

Question: age category?

| **Age status** | **Frequency** | **Percent %** |
| --- | --- | --- |
| Between 18 to 20 years | 51 | 22.6 |
| Between 20 and 30 years | 68 | 30.4 |
| Between 30 and 40 years | 73 | 32.4 |
| Above 40 years | 33 | 14.6 |
| **Total** | **225** | **100.0** |

Source: Field work, 2017.

**Table 3: Percentage distribution of respondents by occupation.**

Question: Occupation?

| **status** | **Frequency** | **Percent %** |
| --- | --- | --- |
| Traders | 73 | 32.4 |
| Civil servants | 51 | 22.6 |
| Students | 68 | 30.4 |
| Artisan | 33 | 14.6 |
| Others | 0 | 0 |
| **Total** | **225** | **100.0** |

Source: Field work, 2017.

**Table 4: Percentage distribution of respondents by marital status.**

Question: Marital Status?

| **Marital Status** | **Frequency** | **Percent %** |
| --- | --- | --- |
| Married | 88 | 39.1 |
| Single | 65 | 28.8 |
| Widowed | 34 | 15.1 |
| Separated | 22 | 9.7 |
| Divorced | 16 | 7.3 |
| **Total** | **225** | **100.0** |

Source: Field work, 2017.

**Table 5: Percentage distribution of respondents by religious affiliation.**

Question: Religious affiliation?

| **Religious Affiliation** | **Frequency** | **Percent %** |
| --- | --- | --- |
| Christians | 155 | 68.8 |
| African Traditional Religion | 50 | 21.4 |
| Muslim | 20 | 10.8 |
| Others | 0 | 0 |
| **Total** | **225** | **100.0** |

Source: Field work, 2017.

**Table 6: Percentage distribution of respondents by level of education.**

Question: Level of Education?

| **Level of education** | **Frequency** | **Percent %** |
| --- | --- | --- |
| None | 19 | 7.9 |
| Primary Level | 41 | 16.07 |
| Secondary level | 77 | 34.2 |
| Tertiary college | 54 | 24 |
| University level | 34 | 17.83 |
| **Total** | **225** | **100.0** |

Source: Field work, 2017.

**Table 7: Percentage distribution of respondents by monthly income.**

Question: Monthly income?

| **Monthly income (N)** | **Frequency** | **Percent %** |
| --- | --- | --- |
| 18,000 – 24,000 | 35 | 15.8 |
| 25,000-44,000 | 51 | 22.6 |
| 45,000-64,000 | 50 | 22.3 |
| 65,000-84,000 | 42 | 18.5 |
| 85,000-104,00 | 25 | 11.1 |
| 105,000 and above | 22 | 9.7 |
| **Total** | **225** | **100.0** |

Source: Field work, 2017.

**Table 8: Percentage distribution of respondents on the relationship between the police and Onitsha residents.**

Question: How would you rate the relationship between the residents and the police?

| **Response** | **Frequency** | **Percent %** |
| --- | --- | --- |
| Very friendly | 16 | 7.2 |
| Fairly | 52 | 23.1 |
| Friendly | 32 | 14.2 |
| Fairly unfriendly | 125 | 55.5 |
| **Total** | **225** | **100.0** |

Source: Field work, 2017.

**Table 9: Percentage distribution of respondents on the on the respondents’ frequency in reporting any suspicious person or activity to the police.**

Question: In regards to community policing, have you ever reported any suspicious person or activity to the police recently?

| **Response** | **Frequency** | **Percent %** |
| --- | --- | --- |
| Yes | 59 | 26.3 |
| No | 166 | 73.7 |
| **Total** | **225** | **100.0** |

Source: Field work, 2017.

**Table 10: Percentage distribution of respondents on the respondents’ expectations on community policing during its launch in the state.**

Question: what were your expectations policing during its launch in the state?

| **Response** | **Frequency** | **Percent %** |
| --- | --- | --- |
| It wouldn’t work | 78 | 34.8 |
| That it will work | 21 | 9.5 |
| That the people will not trust the police to work with them | 68 | 30.2 |
| That vigilante groups will collaborate with the community criminals | 58 | 25.7 |
| **Total** | **225** | **100.0** |

Source: Field work, 2017.

**Table 11: Percentage distribution of respondents on the respondents’ thoughts about community policing as an effective way of fighting crime.**

Question: Do you think that community policing is an effective way of fighting crime?

| **Response** | **Frequency** | **Percent %** |
| --- | --- | --- |
| Yes | 199 | 88.5 |
| No | 26 | 11.5 |
| **Total** | **225** | **100.0** |

Source: Field work, 2017.

**Table 12: Percentage distribution of respondents on the respondents’ perception of the rate of crime in the area after the introduction of community policing.**

Question: Do you perceive that the level of crime reduced in Onitsha after the introduction of community policing programme?

| **Response** | **Frequency** | **Percent %** |
| --- | --- | --- |
| Yes | 33 | 14.7 |
| No | 192 | 85.3 |
| **Total** | **225** | **100.0** |

Source: Field work, 2017.

**Table 13: Percentage distribution of respondents to ascertain if the respondents are consulted by the police on matters touching on their security.**

Question: are Onitsha residents usually consulted by the police on matters touching on their security?

| **Response** | **Frequency** | **Percent %** |
| --- | --- | --- |
| Never | 120 | 53.5 |
| Rarely | 64 | 28.4 |
| Frequently | 21 | 9.3 |
| Always | 20 | 8.8 |
| **Total** | **225** | **100.0** |

Source: Field work, 2017.

**Table 14: Percentage distribution of respondents to ascertain if the residents have received any civic education programme organized by the government, civil society or social workers to create awareness to the residents of Onitsha on the concept of community policing.**

Question: are there any civic education programme organized by the government, civil society or social workers to create awareness to the residents of Onitsha on the concept of community policing?

| **Response** | **Frequency** | **Percent %** |
| --- | --- | --- |
| Yes | 65 | 28.9 |
| No | 160 | 71.1 |
| **Total** | **225** | **100.0** |

Source: Field work, 2017.

**Table 15: Percentage distribution of respondents to know the factor(s) that constitute challenges to community policing implementation in Onitsha.**

Question: what are/is the factor(s) that constitute challenges to community policing implementation in Onitsha?

| **Response** | **Frequency** | **Percent %** |
| --- | --- | --- |
| Lack of trust | 47 | 20.8 |
| Weak informal social control | 39 | 17.5% |
| Dearth of transparency | 34 | 15.1 |
| Absence of organized neighborhood Watch | 34 | 15.1 |
| Lack of Informal Security Education | 36 | 16 |
| Lack of Integrity | 35 | 15.5 |
| **Total** | **225** | **100.0** |

Source: Field work, 2017.

**Table 16: Percentage distribution of respondents to ascertain their trust on police competence in handling crime in the community.**

Question: do you trust the police competence in handling crime in the community?

| **Response** | **Frequency** | **Percent %** |
| --- | --- | --- |
| Yes | 80 | 35.5 |
| No | 145 | 64.4 |
| **Total** | **225** | **100.0** |

Source: Field work, 2017.

**Table 17: Percentage distribution of police/vigilante officer respondents on how long they have worked in the police/vigilante force..**

Question: how long have you worked in the police/vigilante force?

| **Response** | **Frequency** | **Percent %** |
| --- | --- | --- |
| Below a year | 8 | 26.7 |
| 1 – 5 year | 5 | 16.7 |
| 5 – 10 years | 7 | 23.2 |
| 10 – 20 years | 5 | 16.7 |
| 20 years and above | 5 | 16.7 |
| **Total** | **225** | **100.0** |

Source: Field work, 2017.

**Table 1: Percentage distribution of police/vigilante officer respondents on how long they have worked in Onitsha.**

Question: how long have you worked in Onitsha?

| **Response** | **Frequency** | **Percent %** |
| --- | --- | --- |
| Below a year | 5 | 16.8% |
| 1 – 5 year | 6 | 20 |
| 5 – 10 years | 8 | 26.6 |
| 10 – 20 years | 5 | 16.7 |
| 20 years and above | 6 | 20 |
| **Total** | **225** | **100.0** |

Source: Field work, 2017.

**Table 19: Percentage distribution of police/vigilante officer to ascertain if they received any training on community policing.**

Question: have you received any training on community policing?

| **Response** | **Frequency** | **Percent %** |
| --- | --- | --- |
| Yes | 157.5 | 70 |
| No | 67.5 | 30 |
| **Total** | **225** | **100.0** |

Source: Field work, 2017.

**Table 20: Percentage distribution of police/vigilante officer respondents to know the areas they have been train in.**

Question: which of the following areas have you received training in?

| **Response** | **Frequency** | **Percent %** |
| --- | --- | --- |
| Client Service | 42.84 | 19.04 |
| Public orientation | 42.84 | 19.04 |
| Human psychology | 54.45 | 24.2 |
| Social work | 42.84 | 19.04 |
| Project management | 42.84 | 19.04 |
| **Total** | **225** | **100.0** |

Source: Field work, 2017.

**Table 21: Percentage distribution of police/vigilante officer respondents to ascertain if the training has been beneficial to their participation in community policing activities.**

Question: has the training be beneficial to your participation in community policing activities

| **Response** | **Frequency** | **Percent %** |
| --- | --- | --- |
| Yes | 128.7 | 57.2 |
| No | 96.39 | 42.8 |
| **Total** | **225** | **100.0** |

Source: Field work, 2017.

**Table 22: Percentage distribution of police/vigilante officer respondents to know if they have received reports from residents of Onitsha on a suspicious person or activity.**

Question: in regards to community policing, have you recently received reports from residents of Onitsha on a suspicious person or activity?

| **Response** | **Frequency** | **Percent %** |
| --- | --- | --- |
| Yes | 75.15 | 33.4 |
| No | 149.85 | 66.6 |
| **Total** | **225** | **100.0** |

Source: Field work, 2017.

**Table 23: Percentage distribution of police/vigilante officer respondents to know how long it took them to respond to the report.**

Question: how long did it take you and your colleagues to respond?

| **Response** | **Frequency** | **Percent %** |
| --- | --- | --- |
| 30 minutes or less | 30.1 | 30.1 |
| 2 hours | 52.425 | 23.3 |
| 5 hours | 52.425 | 23.3 |
| 10 hours | 52.425 | 23.3 |
| Did not respond at all | 0 | 0.0 |
| **Total** | **225** | **100.0** |

Source: Field work, 2017.

**Table 24: Percentage distribution of police/vigilante officer respondents to know the measures police/vigilante have put in place to manage confidential information and intelligence obtained from the residents.**

Question: what measures has the police/vigilante put in place to manage confidential information and intelligence obtained from the residents?

| **Response** | **Frequency** | **Percent %** |
| --- | --- | --- |
| Removing the calls from recording | 52.65 | 23.4 |
| Avoid getting the resident’s info | 59.85 | 26.6 |
| Make sure that only a selected few picks the distress calls | 112.5 | 50 |
| **Total** | **225** | **100.0** |

Source: Field work, 2017.

**Table 25: Percentage distribution of police/vigilante officer respondents to know if there are police/vigilante informers in Onitsha.**

Question: are there police/vigilante informers in Onitsha?

| **Response** | **Frequency** | **Percent %** |
| --- | --- | --- |
| Yes | 157.5 | 70 |
| No | 67.5 | 30 |
| **Total** | **225** | **100.0** |

Source: Field work, 2017.

**Table 26: Percentage distribution of police/vigilante officer respondents to know if there exists any measure towards monitoring or evaluating the progress of community policing programmes amongst the police.**

Question: are there any measures towards monitoring and evaluation the progress of community policing programme amongst the police?

| **Response** | **Frequency** | **Percent %** |
| --- | --- | --- |
| Yes | 157.5 | 70 |
| No | 67.5 | 30 |
| **Total** | **225** | **100.0** |

Source: Field work, 2017.

**Table 27: Percentage distribution of respondents to know if there exist widespread of belief that the police collude with criminals to commit crime.**

Matrix Question: there is widespread of belief that the police collude with criminals to commit crime?

| **Response** | **Frequency** | **Percent %** |
| --- | --- | --- |
| Strongly agree | 97 | 43.3 |
| Agree | 0 | 0 |
| Not sure | 21 | 9.3 |
| Disagree | 11 | 4.8 |
| Strongly disagree | 96 | 42.6 |
| **Total** | **225** | **100.0** |

Source: Field work, 2017.

**Table 28: Percentage distribution of respondents to know if there exist widespread belief that the police/vigilante officers disguise as criminals to commit crime.**

Matrix Question: There is a widespread belief that police/vigilante officer disguise as criminals to commit crime?

| **Response** | **Frequency** | **Percent %** |
| --- | --- | --- |
| Strongly agree | 96 | 42.8 |
| Agree | 0 | 0 |
| Not sure | 21 | 9.3 |
| Disagree | 11 | 4.8 |
| Strongly disagree | 97 | 43.1 |
| **Total** | **225** | **100.0** |

Source: Field work, 2017.

**Table 29: Percentage distribution of respondents to know whether the police force is characterized by poor client service procedures which discourage residents from reporting crime.**

Matrix Question: the police force is characterized by poor client service procedures which discourage residents from reporting crime?

| **Response** | **Frequency** | **Percent %** |
| --- | --- | --- |
| Strongly agree | 84 | 37.3 |
| Agree | 19 | 8.4 |
| Not sure | 11 | 4.8 |
| Disagree | 21 | 9.4 |
| Strongly disagree | 90 | 40.1 |
| **Total** | **225** | **100.0** |

Source: Field work, 2017.

**Table 30: Percentage distribution of respondents to know if people are eager to cooperate with the community policing strategies in the slum areas.**

Matrix Question: in the slum areas of the city, people are to cooperate with the community policing strategy?

| **Response** | **Frequency** | **Percent %** |
| --- | --- | --- |
| Strongly agree | 90 | 40.2 |
| Agree | 0 | 0 |
| Not sure | 12 | 5.3 |
| Disagree | 20 | 8.8 |
| Strongly disagree | 103 | 45.7 |
| **Total** | **225** | **100.0** |

Source: Field work, 2017.

**Table 31: Percentage distribution of respondents to know if there is shallow understanding by the respondents on the core concepts of community policing.**

Matrix Question: There is shallow understanding by the residents on the core concepts of community policing?

| **Response** | **Frequency** | **Percent %** |
| --- | --- | --- |
| Strongly agree | 104 | 46.3 |
| Agree | 0 | 0 |
| Not sure | 12 | 5.3 |
| Disagree | 10 | 4.4 |
| Strongly disagree | 99 | 44 |
| **Total** | **225** | **100.0** |

Source: Field work, 2017.

**Table 32: Percentage distribution of respondents to know whether crime is a way of living for people in the slum areas and hence difficult to eliminate.**

Matrix Question: in the slum areas of the city, crime is a way of living hence difficult to eliminate?

| **Response** | **Frequency** | **Percent %** |
| --- | --- | --- |
| Strongly agree | 90 | 40.2 |
| Agree | 0 | 0 |
| Not sure | 12 | 5.3 |
| Disagree | 20 | 8.8 |
| Strongly disagree | 103 | 45.7 |
| **Total** | **225** | **100.0** |

Source: Field work, 2017.

**Table 33: Percentage distribution of respondents to know if the Nigeria police/vigilante lacks adequate capacity to counter crime in a densely-populated area such as Onitsha South.**

Matrix Question: the Nigeria Police/vigilante lack adequate capacity to counter crime in a densely-populated area such as Onitsha South?

| **Response** | **Frequency** | **Percent %** |
| --- | --- | --- |
| Strongly agree | 100 | 44.4 |
| Agree | 0 | 0 |
| Not sure | 16 | 7.2 |
| Disagree | 19 | 8.4 |
| Strongly disagree | 90 | 40 |
| **Total** | **225** | **100.0** |

Source: Field work, 2017.

**Table 34: Percentage distribution of respondents to know if the residents are always willing to partner with the police/vigilante in controlling the prevalence of crime in Onitsha South.**

Matrix Question: the residents are always willing to partner with the police in controlling the prevalence of crime in Onitsha South?

| **Response** | **Frequency** | **Percent %** |
| --- | --- | --- |
| Strongly agree | 110 | 48.8 |
| Agree | 0 | 0 |
| Not sure | 16 | 7.3 |
| Disagree | 19 | 8.4 |
| Strongly disagree | 80 | 35.5 |
| **Total** | **225** | **100.0** |

Source: Field work, 2017.

**Table 35: Percentage distribution of respondents to know if the residents are always willing to report suspicious persons or activities to the police/vigilante.**

Matrix Question: the residents are always willing to report suspicious persons or activities to the police/vigilante?

| **Response** | **Frequency** | **Percent %** |
| --- | --- | --- |
| Strongly agree | 110 | 48.8 |
| Agree | 0 | 0 |
| Not sure | 16 | 7.3 |
| Disagree | 19 | 8.4 |
| Strongly disagree | 80 | 35.5 |
| **Total** | **225** | **100.0** |

Source: Field work, 2017.

**Table 36: Cross tabulation for testing the above hypothesis**

Gender of respondents

**Male Female Total**

Report of crime or suspicious Yes 28 31 **59 (26.2%)**

activities to the police No 97 69 **166 (73.7%)**

**Total 125 (55.5%) 100(44.5%) 225 (100%)**

*Chi-square = 27.1 at degree of freedom 1, significance level = .083*

**Table 37: Cross tabulation for testing the above hypothesis**

Educational level of respondents

**Lower level Higher level Total**

**(NFE, FSLC, SSCE) (Tertiary College &**

**Unuversity level)**

Report of crime or suspicious Yes 52 28 **80 (35.5%)**

activities to the police No 85 60 **145 (64.4%)**

**Total 137 (60.9%) 88(39.1%) 225 (100%)**

*Chi-square = 12.9 at degree of freedom 1, significance level = .031.*

**Table 38: Cross tabulation for testing the above hypothesis.**

**Eagerness to cooperate with community policing strategies**

Very Fairly Friendly Fairly Total

friendly friendly unfriendly

**Residents in** SA 1 17 11 57 84(37.3%)

**slum areas are**

**eager to** Agree3 6 3 7 19(8.4%)

**cooperate with**

**community** Not sure 1 3 4 3 11(4.8%)

**policing**

**strategies** Disagree 2 8 3 8 21(9.4%)

SD 9 18 11 52 90(40.1%)

Total 16 (7.15) 52 (23.1%) 32 (14.2%) 125(55.5%) 225(100%)

Chi-square =4.02 at degree of freedom 1, Significance level =.002
